# Supplementary material for: Special Microbial cmmunity sturucture formed by Taraxacum koksaghyz Rodin rhizosphere soil in Extreme Saline and Alkaline Environments
Source: Research Square preprint supplement (doi:10.21203/rs.3.rs-8662224/v1), 2026-02-10
Supplement: Supplementary file 1 [file 1a468c0401d04b4fb1e85f11.docx]

**Table 1** .Statistic amplitor sequenc and alpha diversity analysis of the bacteria and fungal community

|  | Sample name | OTUs amount | Seq amount | ACE index | Chao index | shannon index | simpson index | sobs index | coverage |
| --- | --- | --- | --- | --- | --- | --- | --- | --- | --- |
| Bacteria | TK_1 | 2583.00 | 44638.00 | 3152.52±269.44ab | 2985.20±243.07ab | 5.67±0.35bc | 0.03±0.02a | 2573±247.05ab | 0.98 |
| TK_3 | 2489.67 | 44638.00 | 2956.07±114.51b | 2820.18±98.78b | 6.00±0.13ab | 0.009±0.002bc | 2493.33±73.92c | 0.99 |
| TK_5 | 2839.00 | 44638.00 | 3348.17±151.28a | 3244.57±105.09a | 6.42±0.07a | 0.006±0.0006c | 2828.67±124.31a | 0.99 |
| ZS_1 | 2551.00 | 44638.00 | 2973.98±123.67b | 2835.31±61.61b | 6.19±0.07a | 0.0064±0.0004c | 2546±104.48ab | 0.99 |
| ZS_2 | 2382.00 | 44638.00 | 2966.57±175.67b | 2815.73±178.36b | 5.39±0.40c | 0.024±0.01ab | 2360.33±143.77c | 0.98 |
| fungal | TK_1 | 325 | 76389 | 334.45±19.47a | 334.66±20.32a | 3.12±0.18a | 0.13±0.04a | 325±14.73a | 1.00 |
| TK_3 | 272 | 76389 | 275.97±16.34ab | 276.206±16.22ab | 3.55±0.50a | 0.08±0.07a | 272±16.52ab | 1.00 |
| TK_5 | 273.67 | 76389 | 277.13±88.63ab | 280.07±86.94ab | 3.01±1.25a | 0.21±0.25a | 273.67±90.74ab | 1.00 |
| ZS_1 | 222 | 76389 | 227.4±10.01bc | 226.25±10.58bc | 3.28±0.21a | 0.096±0.02a | 222±12.29bc | 1.00 |
| ZS_2 | 167.33 | 76389 | 168.34±15.65c | 168.06±15.89c | 3.11±0.31a | 0.14±0.06a | 167.33±15.95c | 1.00 |

**Table 2** .Envfit function test of environmental factors for the bacterial community

| Parameter | RDA1 | RDA2 | r2 | P_value |
| --- | --- | --- | --- | --- |
| TN | 0.98462 | -0.1747 | 0.46976 | 0.021 |
| OM | 0.98889 | -0.14867 | 0.40458 | 0.039 |
| AP | -0.46137 | -0.88721 | 0.07118 | 0.632 |
| RAP | 0.99306 | -0.11763 | 0.52278 | 0.023 |
| pH | 0.99465 | -0.10333 | 0.40118 | 0.06 |
| TS | 0.9753 | -0.22089 | 0.48869 | 0.02 |
| K+ | 0.9929 | -0.11895 | 0.33135 | 0.084 |
| Na+ | 0.99977 | 0.02164 | 0.65918 | 0.008 |
| Cl- | 0.99658 | -0.08262 | 0.5268 | 0.014 |
| HCO3- | 0.99301 | -0.11805 | 0.47155 | 0.02 |
| Ca2+ | 0.96003 | 0.27989 | 0.01839 | 0.897 |
| Mg2+ | 0.97325 | -0.22976 | 0.48465 | 0.029 |
| SO42- | -0.40487 | 0.91437 | 0.22428 | 0.204 |

**Table 3** .Envfit function test of environmental factors for the fungal community

| parameter | CCA1 | CCA2 | r2 | P_value |
| --- | --- | --- | --- | --- |
| TN | -0.91329 | -0.40731 | 0.57374 | 0.008 |
| OM | -0.9045 | -0.42648 | 0.52636 | 0.01 |
| AP | 0.99985 | -0.01744 | 0.03032 | 0.829 |
| RAP | -0.88431 | -0.4669 | 0.52278 | 0.015 |
| pH | -0.90602 | -0.42323 | 0.34701 | 0.078 |
| TS | -0.91733 | -0.39813 | 0.55743 | 0.008 |
| K+ | -0.89648 | -0.44309 | 0.28949 | 0.125 |
| Na+ | -0.89355 | -0.44897 | 0.54655 | 0.017 |
| Cl- | -0.86018 | -0.50999 | 0.63212 | 0.007 |
| HCO3- | -0.90599 | -0.4233 | 0.72104 | 0.001 |
| Ca2+ | -0.72156 | 0.69235 | 0.18554 | 0.286 |
| Mg2+ | -0.82366 | -0.56708 | 0.5443 | 0.011 |
| SO42- | 0.12513 | 0.99214 | 0.58176 | 0.002 |
