# Supplementary material for: Special Microbial cmmunity sturucture formed by Taraxacum koksaghyz Rodin rhizosphere soil in Extreme Saline and Alkaline Environments
Source: Research Square preprint supplement (doi:10.21203/rs.3.rs-8662224/v1), 2026-02-10
Supplement: Supplementary file 2 [file 7e9a7b327e4d7809631edf3d.docx]

**Supplementary Table1.**Physical and chemical characteristics of rhizosphere soil of Different sampling points

| sample name | TK_1 | TK_3 | TK_5 | ZS_1 | ZS_2 |
| --- | --- | --- | --- | --- | --- |
| TN | 1514.82±714.16b | 1716.24±533.45b | 1506.81±723.89b | 4271.79±1813.49a | 4125.29±1686.17a |
| OM | 28621.03±15217.24a | 41279±15543.87b | 29094.12±14650.81a | 69729.05±33135.51c | 65767±29493.28c |
| AP | 12.08±10.58a | 14.94±8.15b | 12.91±9.67a | 17.26±5.05c | 15.40±3.41b |
| RAP | 147.67±74.85a | 198±84.93b | 153.33±70.88a | 956±530.92c | 1216±249.42c |
| pH | 8.20±0.17a | 8.1±0.01a | 8.15±0.08a | 8.77±0.65b | 8.97±0.40b |
| TS | 8095±1546.19a | 6525±2481.67a | 8510±1966.22a | 17010±3013.58b | 18125±2035.15b |
| K+ | 89.44±56.14573a | 109.55±53.95875a | 92.43±54.43111a | 537.29±506.67652b | 653.33±393.03b |
| Na+ | 136.33±169.81b | 34.5±27.88a | 129.3333±157.84b | 2170±690.87c | 4240±1281.72c |
| Cl- | 89.09±105.64a | 157.96±224.89b | 81.76±92.95a | 1392±562.27c | 1989.83±763.92c |
| HCO3- | 176.87±39a | 181.78±47.38a | 147.39±14.74a | 299.70±30.68b | 309.53±0b |
| Ca²⁺ | 1666.19±717.15a | 1349.43±704.49a | 1692.94±737.14a | 1672.17±154.35a | 1815.07±101.03b |
| Mg²⁺ | 136.91±80.25a | 92.99±64.65a | 143±87.55a | 893.92±361.75b | 946.92±173.77b |
| SO₄²¯ | 3101.76±1463.31b | 1990.50±1771.80a | 3043.95±1417.92b | 1386.74±225.28a | 1858.57±337.3a |
